# Supplementary material
Source: PubMed Central journal article supplement (PMC2743475)
Supplement: NIHMS133445-supplement-01.pdf [file NIHMS133445-supplement-01.pdf]

**The marine natural-derived inhibitors of glycogen synthase kinase-3 $\beta$   
phenylmethylen hydantoins: In vitro and in vivo activities and  
pharmacophore modeling**

Mohammad A. Khanfar, Bilal Abu Asal, Mudit Mudit, Amal Kadduomi, and Khalid A.  
El Sayed\*

*Department of Basic Pharmaceutical Sciences, College of Pharmacy, University of  
Louisiana at Monroe, Monroe, Louisiana 71201*

\* To whom correspondence should be addressed. Tel: +1 318 342 1725; fax: +1 318 342 1737; e-mail: [elsayed@ulm.edu](mailto:elsayed@ulm.edu)

## Table of Contents

|                                                                                                                                                 | Page number |
|-------------------------------------------------------------------------------------------------------------------------------------------------|-------------|
| Table S1. <sup>1</sup> H NMR Data of Compounds <b>1-4</b> and <b>6-8</b> .....                                                                  | 3           |
| Table S2. <sup>13</sup> C NMR Data of Compounds <b>1-4</b> and <b>6-8</b> .....                                                                 | 4           |
| Table S3. Mass and Melting Point Data of Compounds <b>1-4</b> and <b>6-8</b> .....                                                              | 5           |
| Figure S1. Representative examples for the active GSK-3β inhibitors used to validate the pharmacophore model.....                               | 6           |
| Figure S2. Representative examples for the inactive GSK-3β inhibitors used to validate the pharmacophore model.....                             | 7           |
| Figure S3. Docking pose of inhibitor I-5 as produced by docking simulation versus the crystallographic structure of <b>3</b> within GSK-3β..... | 8           |

**Table S1.** <sup>1</sup>H NMR Data of Compounds **1-4** and **6-8**.<sup>a</sup>

| Position | $\delta_{\text{H}}$ |               |                    |                     |          |                     |               |
|----------|---------------------|---------------|--------------------|---------------------|----------|---------------------|---------------|
|          | <b>1</b>            | <b>2</b>      | <b>3</b>           | <b>4</b>            | <b>6</b> | <b>7</b>            | <b>8</b>      |
| 1        | 10.36, brs          | 10.41, brs    | 10.38, brs         | 10.60, brs          | 10.54    | 10.20, brs          | 10.32, brs    |
| 2        | 11.17, brs          | 11.13, brs    | 11.04, brs         | 11.27, brs          | 11.23    | 11.52, brs          | 11.04, brs    |
| 6        | 6.36, s             | 6.36, s       | 6.33, s            | 6.39, s             | 6.45, s  | 6.43, s             | 6.39, s       |
| 7        | -                   | -             | -                  | -                   | -        | -                   | -             |
| 8        | 7.47, d (8.4)       | 7.56, d (8.4) | 7.44, d (8.0)      | 7.19, d (8.0)       | -        | 7.68, 2H, m         | 7.67, d (8.1) |
| 9        | 6.78, d (8.4)       | 7.28, d (8.4) | 6.65, d (8.0)      | 7.32, dd (8.0, 8.0) | 7.68, m  | 7.66, 2H, m         | 7.47, d (8.1) |
| 10       | -                   | -             | -                  | 6.90, dd (8.6, 2.2) | 7.40, m  | -                   | -             |
| 11       | 6.78, d (8.4)       | 7.28, d (8.4) | 6.65, d (8.0)      | -                   | 7.18, m  | 7.66, 2H, m         | 7.47, d (8.1) |
| 12       | 7.47, d (8.4)       | 7.56, d (8.4) | 7.44, d (8.0)      | 7.12, s             | 7.42, m  | 7.68, 2H, m         | 7.67, d (8.1) |
| 1'       | -                   | 3.02, q (7.4) | -                  | -                   | -        | -                   | -             |
| 2'       | -                   | 1.23, t (7.4) | 3.36, 2H, q (10.3) | 3.83, 3H, s         | -        | -                   | -             |
| 3'       | -                   | -             | 1.09, 3H, t (7.0)  | -                   | 7.51, m  | 7.59, dd (5.1, 1.1) | -             |
| 4'       | -                   | -             | 3.36, 2H, q (10.3) | -                   | 7.17, m  | 7.16, dd (5.1, 3.7) | -             |
| 5'       | -                   | -             | 1.09, 3H, t (7.0)  | -                   | 7.67, m  | 7.62, dd (3.7, 1.1) | -             |
| OH       | 9.98, brs           | -             | -                  | -                   | -        | -                   | -             |

<sup>a</sup>In DMSO, 400 MHz. Coupling constants (*J*) are in Hz.

**Table S2.**  $^{13}\text{C}$  NMR Data of Compounds **1-4** and **6-8**.<sup>a</sup>

| Position | $\delta_{\text{C}}$ |                       |                       |                       |                        |           |           |
|----------|---------------------|-----------------------|-----------------------|-----------------------|------------------------|-----------|-----------|
|          | <b>1</b>            | <b>2</b>              | <b>3</b>              | <b>4</b>              | <b>6</b>               | <b>7</b>  | <b>8</b>  |
| 2        | 156.6, qC           | 156.6, qC             | 156.1 qC              | 155.8, qC             | 156.2, qC              | 156.3, qC | 156.0, qC |
| 4        | 166.7, qC           | 166.5, qC             | 166.3, qC             | 166.1, qC             | 165.9, qC              | 166.1, qC | 165.8, qC |
| 5        | 126.4, qC           | 137.8, qC             | 124.0, qC             | 129.2, qC             | 130.0, qC              | 128.4, qC | 124.4, qC |
| 6        | 110.4, CH           | 108.2, CH             | 111.1, CH             | 109.9, CH             | 107.1, CH              | 108.2, CH | 107.3, CH |
| 7        | 124.9, qC           | 128.3, qC             | 120.0, qC             | 135.5, qC             | 131.4, qC              | 132.6, qC | 132.6, qC |
| 8        | 132.3, CH           | 130.4, CH             | 131.9, CH             | 122.6, CH             | 134.5, qC              | 130.7, CH | 129.2, CH |
| 9        | 116.8, CH           | 127.8, CH             | 111.8, CH             | 130.6, CH             | 128.0, CH              | 126.0, CH | 128.6, CH |
| 10       | 159.0, CH           | 130.5, qC             | 148.1, qC             | 115.8, CH             | 129.2, CH              | 134.0, qC | 133.8, qC |
| 11       | 116.8, CH           | 127.8, CH             | 111.8, CH             | 160.1, qC             | 128.5, CH <sup>b</sup> | 126.0, CH | 128.6, CH |
| 12       | 132.3, CH           | 130.4, CH             | 131.9, CH             | 115.0, CH             | 128.7, CH              | 130.7, CH | 129.2, CH |
| 1'       |                     | 26.0, CH <sub>2</sub> | 40.5, CH <sub>2</sub> | -                     | -                      | -         |           |
| 2'       |                     | 14.6, CH <sub>3</sub> | 13.0, CH <sub>3</sub> | 56.2, CH <sub>3</sub> | 141.5, qC              | 143.2, qC |           |
| 3'       |                     |                       | 40.5, CH <sub>2</sub> |                       | 130.7, CH              | 126.8, CH |           |
| 4'       |                     |                       | 13.0, CH <sub>3</sub> |                       | 128.6, CH <sup>b</sup> | 129.2, CH |           |
| 5'       |                     |                       |                       |                       | 130.0, CH              | 124.9, CH |           |

<sup>a</sup>In DMSO, 100 MHz. Carbon multiplicities were determined by APT experiments. qC = quaternary, CH = methine carbons, CH<sub>2</sub> = methylene, CH<sub>3</sub> = methyl carbons.

**Table S3.** Mass and Melting Point Data of Compounds **1-4** and **6-8**.<sup>40</sup>

| Compound No. | (M+1) | Melting Point (°C) |
|--------------|-------|--------------------|
| <b>1</b>     | 205.5 | 311-314            |
| <b>2</b>     | 248.1 | 222-225            |
| <b>3</b>     | 260.5 | 256-258            |
| <b>4</b>     | 219.1 | 178-180            |
| <b>6</b>     | 270.0 | 247-250            |
| <b>7</b>     | 270.0 | 299-301            |
| <b>8</b>     | 232.2 | 303-305            |
